# Supplementary material for: Towards the continuous production of high crystallinity graphene via electrochemical exfoliation with molecular in situ encapsulation
Source: Royal Society of Chemistry journal article supplement (doi:10.1039/c5nr03669k), 2015-01-01

## Supporting Informations

### Towards the continuous production of high crystallinity graphene via electrochemical exfoliation with molecular in-situ encapsulation

Chia-Hsuan Chen, Shiou-Wen Yang, Min-Chiang Chuang, Wei-Yen Woon and Ching-Yuan Su\*

**Table S1. The electrolyte recipes with various concentrations of melamine additives.**

| Number | H <sub>2</sub> SO <sub>4</sub><br>(g/100ml) | Melamine<br>(mg/10 ml) | Siring<br>(RPM) | Current(A) | Exfoliated Graphene (g) |
|--------|---------------------------------------------|------------------------|-----------------|------------|-------------------------|
| 1      | 2.4                                         | 0                      | 150             | 3          | ----- *                 |
| 2      | 4.8                                         | 0                      | 150             | 3          | 0.437                   |
| 3      | 6.5                                         | 0                      | 150             | 3          | 0.414                   |
| 4      | 2.4                                         | 20                     | 150             | 3          | ----- *                 |
| 5      | 4.8                                         | 20                     | 150             | 3          | 0.597                   |
| 6      | 6.5                                         | 20                     | 150             | 3          | 0.424                   |
| 7      | 6.5                                         | 22                     | 150             | 3          | 0.548                   |
| 8      | 6.5                                         | 22                     | 0               | 3          | 0.340                   |
| 9      | 6.5                                         | 10                     | 150             | 3          | 0.624                   |
| 10     | 6.5                                         | 20                     | 150             | 3          | 0.469                   |
| 11     | 6.5                                         | 60                     | 150             | 3          | 0.479                   |
| 12     | 6.5                                         | 100                    | 150             | 3          | 0.424                   |
| 13     | 6.5                                         | 200                    | 150             | 3          | 0.319                   |

\*: The amount of exfoliated graphene is much lower and unavailable for measurement.

**Figure S2. The characterizations of energy-dispersive X-ray spectroscopy(EDS) on as-prepared graphene**

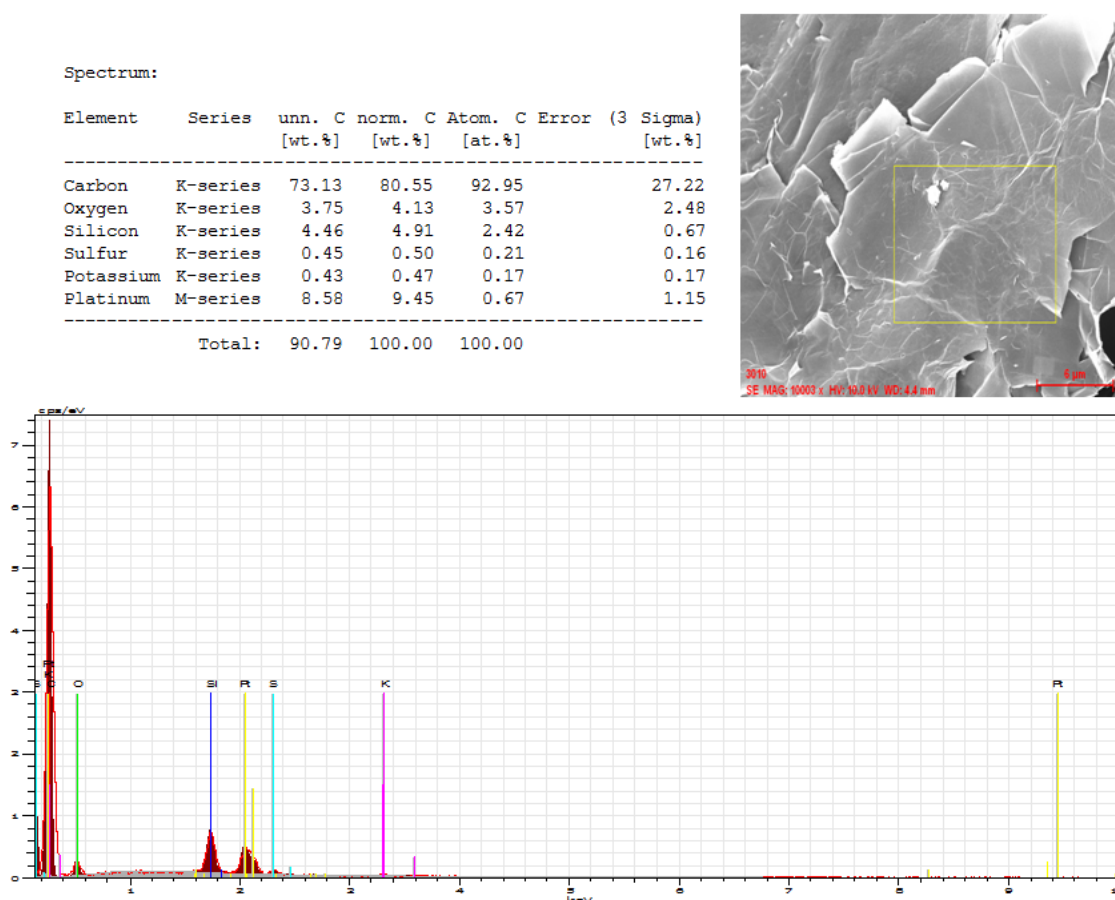

### S3 Comparison with other graphene production methods

Here, we analyzed 56 reported papers that involve the production of graphene via a liquid processing method, including intensive ultrasonication, GO and rGO, ball milling, etc. All of the studied papers use graphite powder as the starting material. However, most of these papers reported a production rate below 0.01 g/hr, which is lower compared with the production rate of our method ( $>0.02\text{g/hr}$ ). Moreover, the level of quality of graphene produced, such as oxidation degree and D/G ratio, are included for this discussion. It is clear seen that the flake size prepared by our method is 10 to 100 times larger than other works.

**Table S3. The comparison with graphene production methods**

| <b>Ref</b>       | <b>Method</b>                                                  | <b>Flake size</b>                       | <b>Raman D/G ratio</b>      | <b>Oxidation degree(O%)</b> | <b>Production rate (g/hr)</b> |
|------------------|----------------------------------------------------------------|-----------------------------------------|-----------------------------|-----------------------------|-------------------------------|
| <b>This work</b> | <b>Electrochemical Exfoliation in the presence of melamine</b> | <b>12~35 <math>\mu\text{m}</math></b>   | <b>0.53<br/>(532 nm)</b>    | <b>3.68<br/>(by XPS)</b>    | <b>1.54</b>                   |
| <b>1</b>         | <b>Wet milling in SDS</b>                                      | <b>0.1-1.4 <math>\mu\text{m}</math></b> | <b>0.6-0.7<br/>(532 nm)</b> | <b>N/A</b>                  | <b>1.5</b>                    |
| <b>2</b>         | <b>Shear exfoliation in organic solvent</b>                    | <b>300-800 nm</b>                       | <b>0.17~0.37</b>            | <b>None</b>                 | <b>5.3</b>                    |
| <b>3</b>         | <b>Liquid phase exfoliation(in pyrene)</b>                     | <b>2-2.5 <math>\mu\text{m}</math></b>   | <b>0.33<br/>(633 nm)</b>    | <b>N/A</b>                  | <b>0.02</b>                   |
| <b>4</b>         | <b>GO by Hummers' method</b>                                   | <b>1~5</b>                              | <b>&gt;1</b>                | <b>16</b>                   | <b>0.45</b>                   |

#### **Reference**

**[1] Catharina Knieke et al., Scalable production of graphene sheets by mechanical delamination. Carbon , 3196-3204, (2010)**

**[2] Keith R et al., Scalable production of large quantities of defect-free few-layer graphene by shear exfoliation in liquids, Nature Materials, 624-630, (2014)**

[3] Parviz, D. *et al.* Dispersions of Non-Covalently Functionalized Graphene with Minimal Stabilizer. *ACS Nano* 6, 8857-8867, (2012).

[4] Ken-Hsuan Liao et al., Aqueous Only Route toward Graphene from Graphite Oxide. *ACS Nano* , 1253-1258, (2011)

S4 . XRD patterns of (a) EC-graphene and (b) graphite

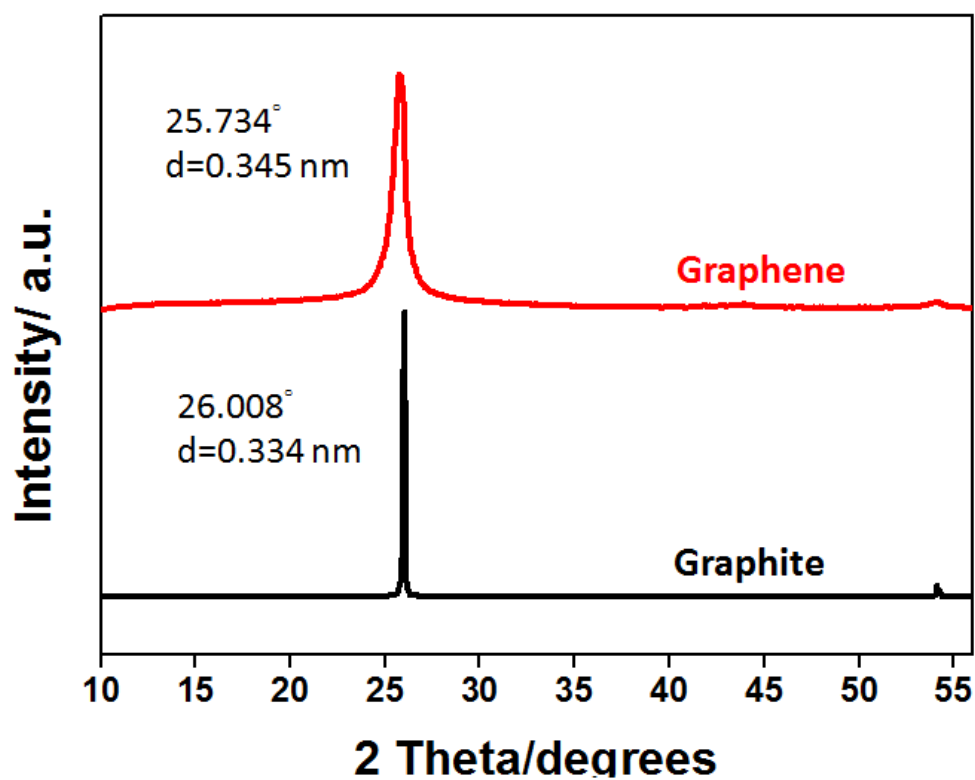

Supplement: c5nr03669k1.pdf [file c5nr03669k1.pdf]
